# Supplementary material
Source: publisher figshare collection journal article supplement (https://aacr.figshare.com/articles/dataset/_/22413609)
Supplement: Supplementary file 1 [file 39859629]

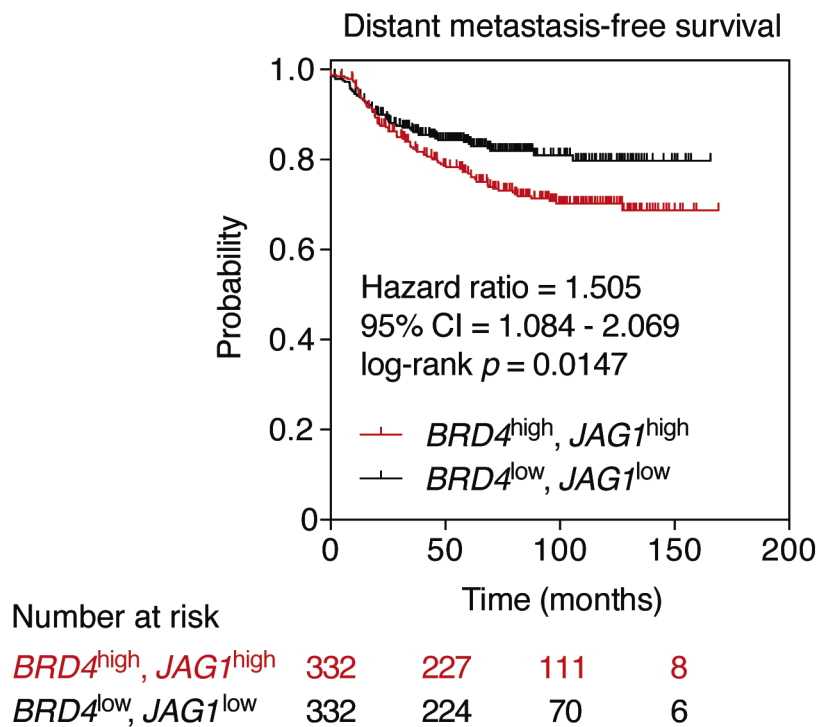

**Figure S4. *BRD4* and *JAG1* expression correlate with disseminated human breast cancer *in vivo*.**

Kaplan-Meier curve to plot distant metastasis-free survival of 664 breast cancer patients was calculated from the Kaplan-Meier plotter database. Patients were subdivided into 'high expression' (*BRD4*<sup>high</sup>, *JAG1*<sup>high</sup>, n=332) and 'low expression' (*BRD4*<sup>low</sup>, *JAG1*<sup>low</sup>, n=332) groups of equal size, based on median expression of *BRD4* and *JAG1*. Hazard ratio, 95% confidence interval (CI) and *p* value are indicated. The number of patients at risk is also indicated.
